# Supplementary material
Source: PubMed Central journal article supplement (PMC6648657)
Supplement: NIHMS972910-supplement.pdf [file NIHMS972910-supplement.pdf]

Supplemental Figures

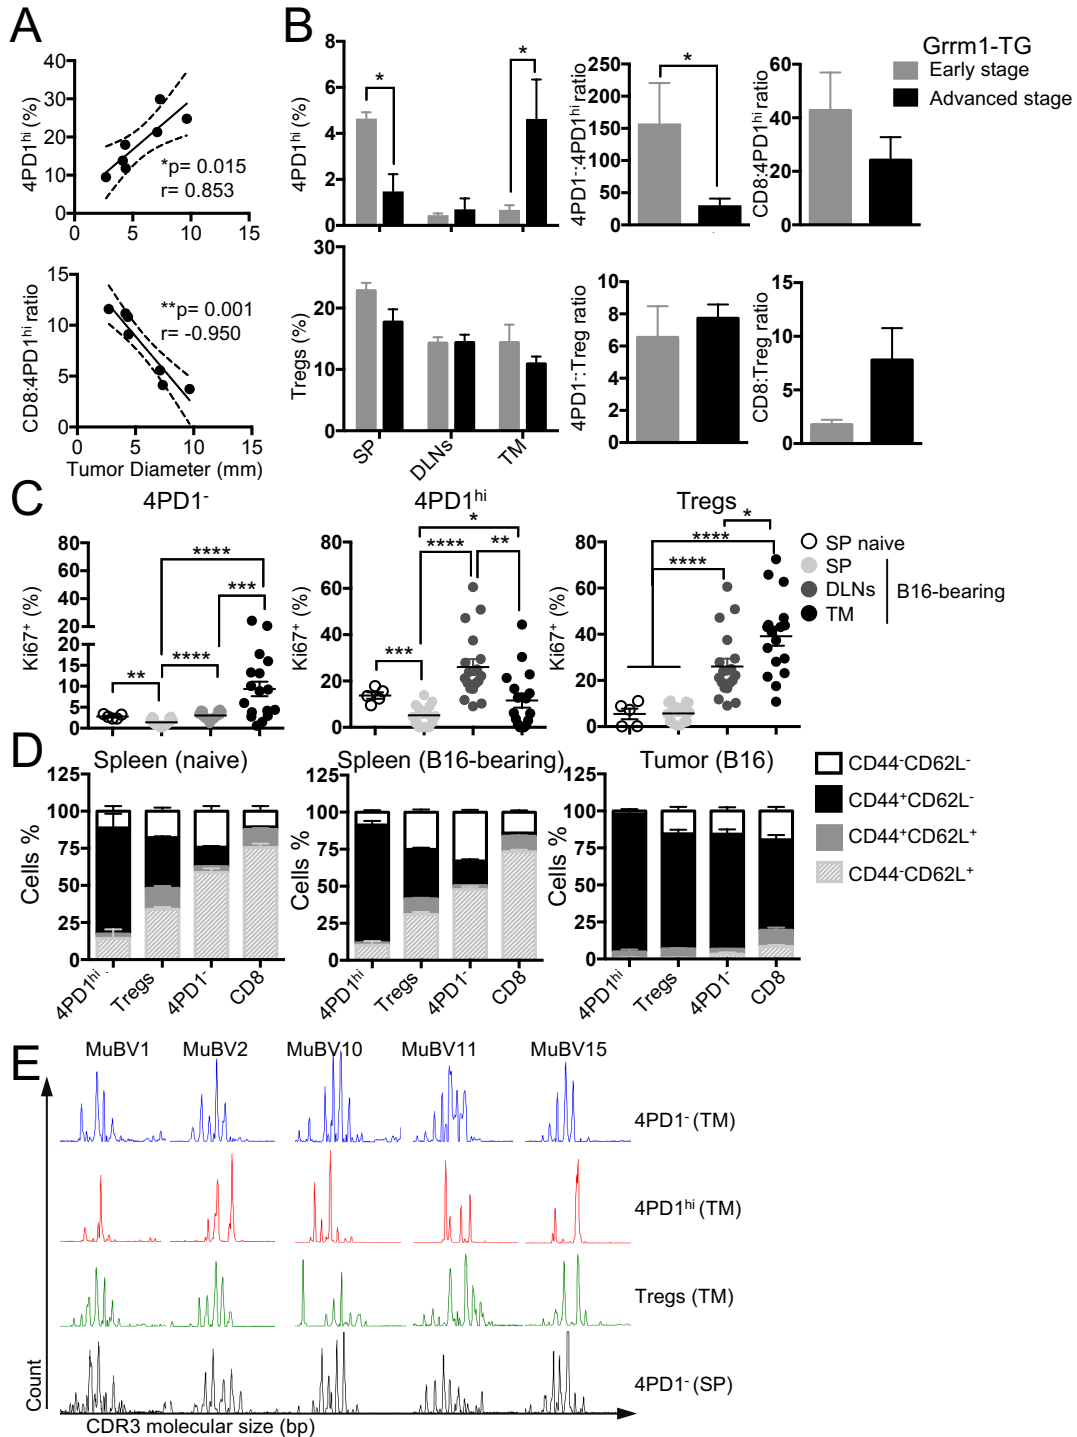

**Figure S1.** Related to Figure 1. 4PD1<sup>hi</sup> accumulate at the tumor site with tumor progression and are antigen-experienced T cells. (A) Correlation of tumor burden with intra-tumor 4PD1<sup>hi</sup> frequency and CD8:4PD1<sup>hi</sup> ratio in mice injected with the same amount of B16 cells (10<sup>5</sup> cells). P values and Pearson r correlation coefficients are reported on the graphs. (B) Frequency of 4PD1<sup>hi</sup> and Tregs in spleen (SP), tumor-draining lymph nodes (DLNs) and tumor (TM), and ratios between the indicated T-cell subsets at the tumor site in

Grm1-TG spontaneous melanoma mouse model at an early (3 months old; mean  $\pm$  SEM; n=3) or advanced (6 months old; mean  $\pm$  SEM; n=5) stage of melanoma development (unpaired t test). FACS analysis of Ki67 (C), CD44 and CD62L (D) expression in the indicated cell subsets and anatomic locations in naive and B16-bearing mice as in Figure 1A (mean  $\pm$  SEM; unpaired t test). (E) Examples of CDR3 spectratypes (TCRBV1, TCRBV2, TCRBV10, TCRBV11 and TCRBV15; Table S1) in 4PD1<sup>hi</sup>, Tregs and 4PD1<sup>+</sup> sorted from tumors (TM) of B16-bearing Foxp3-GFP transgenic mice. The same analysis in 4PD1<sup>+</sup> isolated from naive spleens (SP) is reported as control. \* = p<0.05, \*\* = p<0.01, \*\*\* = p<0.001, \*\*\*\* = p<0.0001.

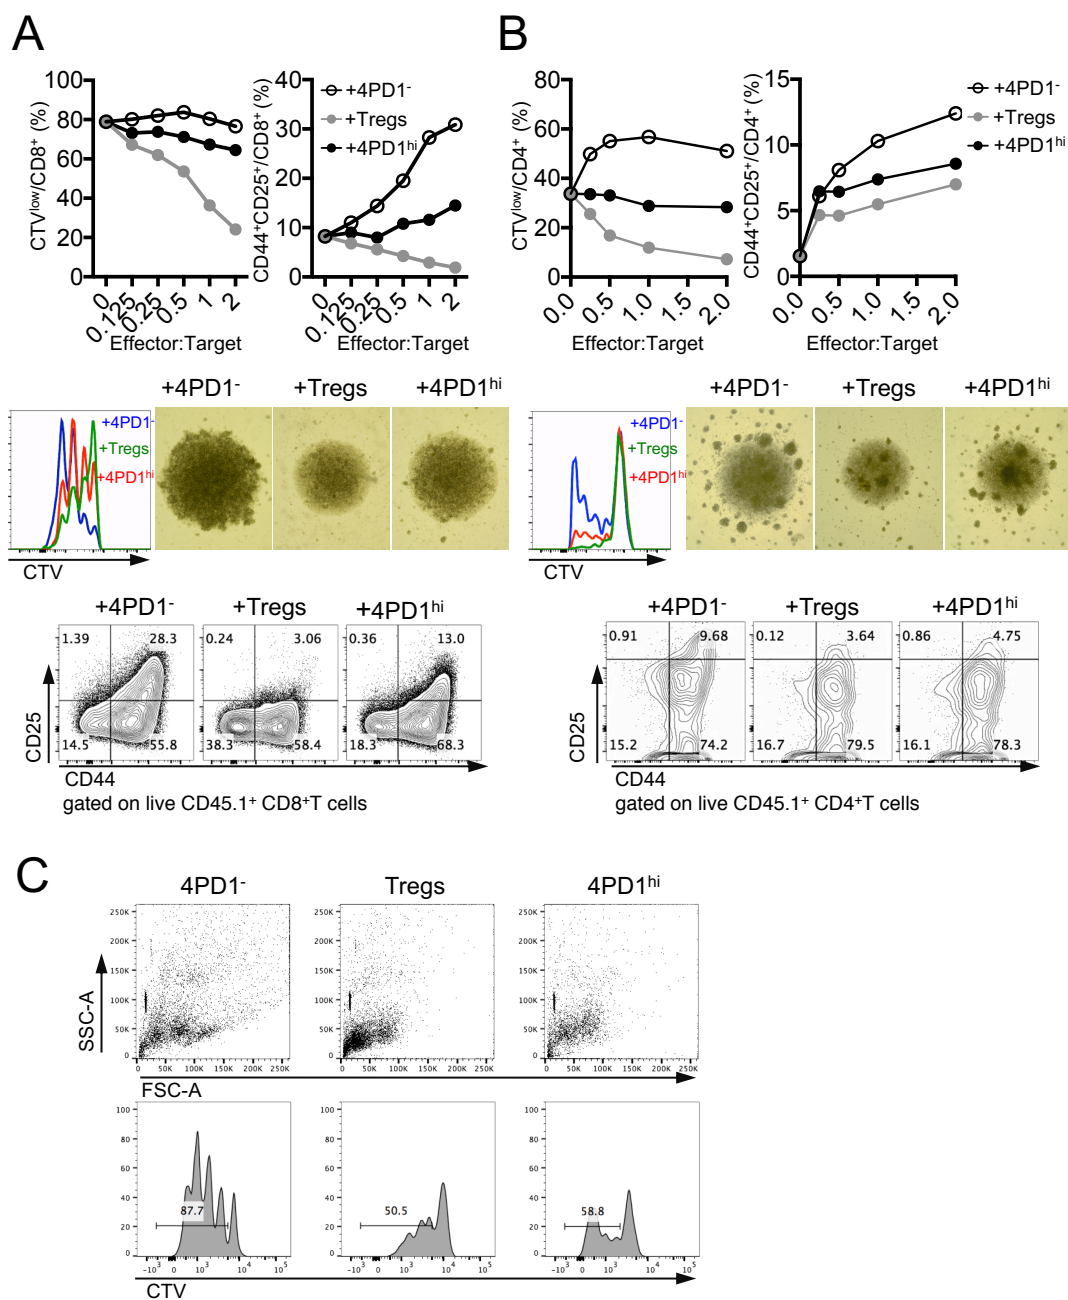

Figure S2. Related to Figure 2. Mouse 4PD1<sup>hi</sup> limit T-cell effector functions. (A,B) 4PD1<sup>hi</sup>, 4PD1<sup>-</sup> and conventional Tregs were FACS-sorted from spleens of naive non-tumor-bearing Foxp3-GFP transgenic mice and tested in suppression assays at the indicated ratios as described in Figure 2A. Data show the results of two additional independent experiments using as target CTV-labeled CD45.1<sup>+</sup> CD8<sup>+</sup> (A) or CD4<sup>+</sup> (B) T cells (1x10<sup>5</sup> cells/condition). Proliferation and activation of target cells were measured by FACS analysis of respectively CTV dilution and frequency of CD44<sup>+</sup>CD25<sup>+</sup> cells after 48- (A) or 72-hr culture (B). Representative FACS plots and pictures show results from co-cultures at 1:1=effector:taregt ratio. (C) Proliferation capacity of spleen-derived 4PD1<sup>-</sup>, Tregs and 4PD1<sup>hi</sup> after 72-hr stimulation with anti-CD3/CD28 coated beads.

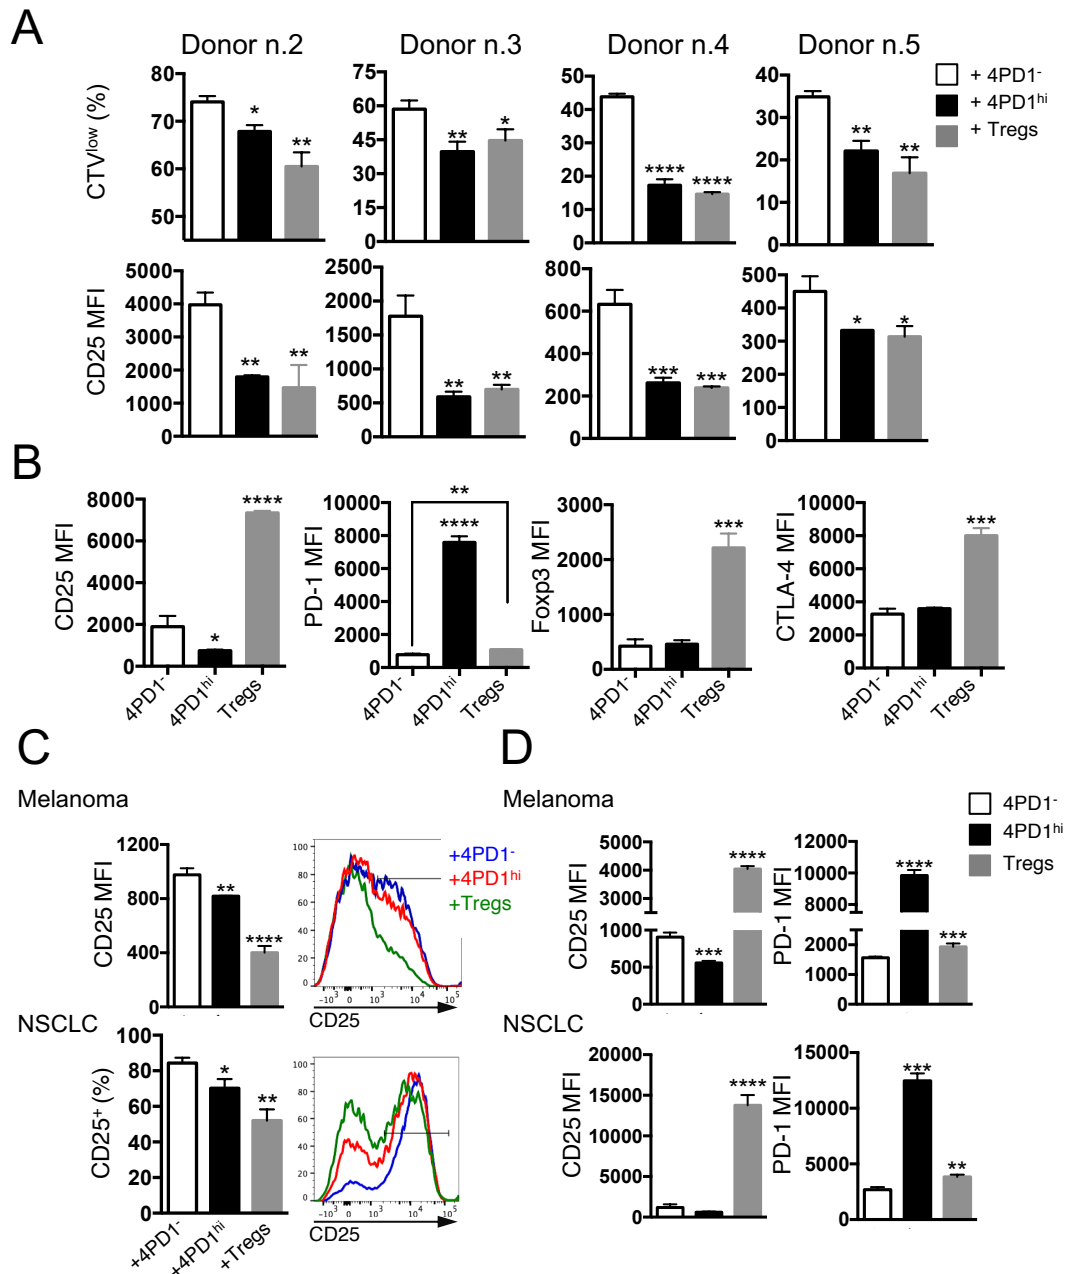

**Figure S3. Related to Figure 3. Human 4PD1<sup>hi</sup> limit T-cell effector functions.** (A) Effects of circulating 4PD1<sup>hi</sup> and Tregs in comparison with 4PD1<sup>-</sup> from 4 additional healthy donors on proliferation (CTV<sup>low</sup> %) and activation (CD25 MFI) of autologous target CD4<sup>+</sup> T cells (1:1 ratio) after 72-hr co-culture (mean ± SD; n=2-3; unpaired t test, 4PD1<sup>hi</sup> and Tregs vs 4PD1<sup>-</sup>). (B) Phenotype of donor-derived effector CD4<sup>+</sup> T-cell subsets (4PD1<sup>hi</sup>, Tregs and 4PD1<sup>-</sup>) after *in vitro* culture with target CD4<sup>+</sup> T cells for 72 hr as in Figure 3A (mean ± SD; n=3; unpaired t test, 4PD1<sup>hi</sup> and Tregs vs 4PD1<sup>-</sup>). (C) CD25 expression (MFI or frequency of positive cells) in tumor-derived target CD4<sup>+</sup> T cells and (D) phenotypic analysis of tumor-derived effector CD4<sup>+</sup> T-cell subsets from *in vitro* suppression assays shown in Figure 3B (mean ± SD; unpaired t test, 4PD1<sup>hi</sup> and Tregs vs 4PD1<sup>-</sup>). \* = p<0.05, \*\* = p<0.01, \*\*\* = p<0.001, \*\*\*\* = p<0.0001. Auto, autologous.

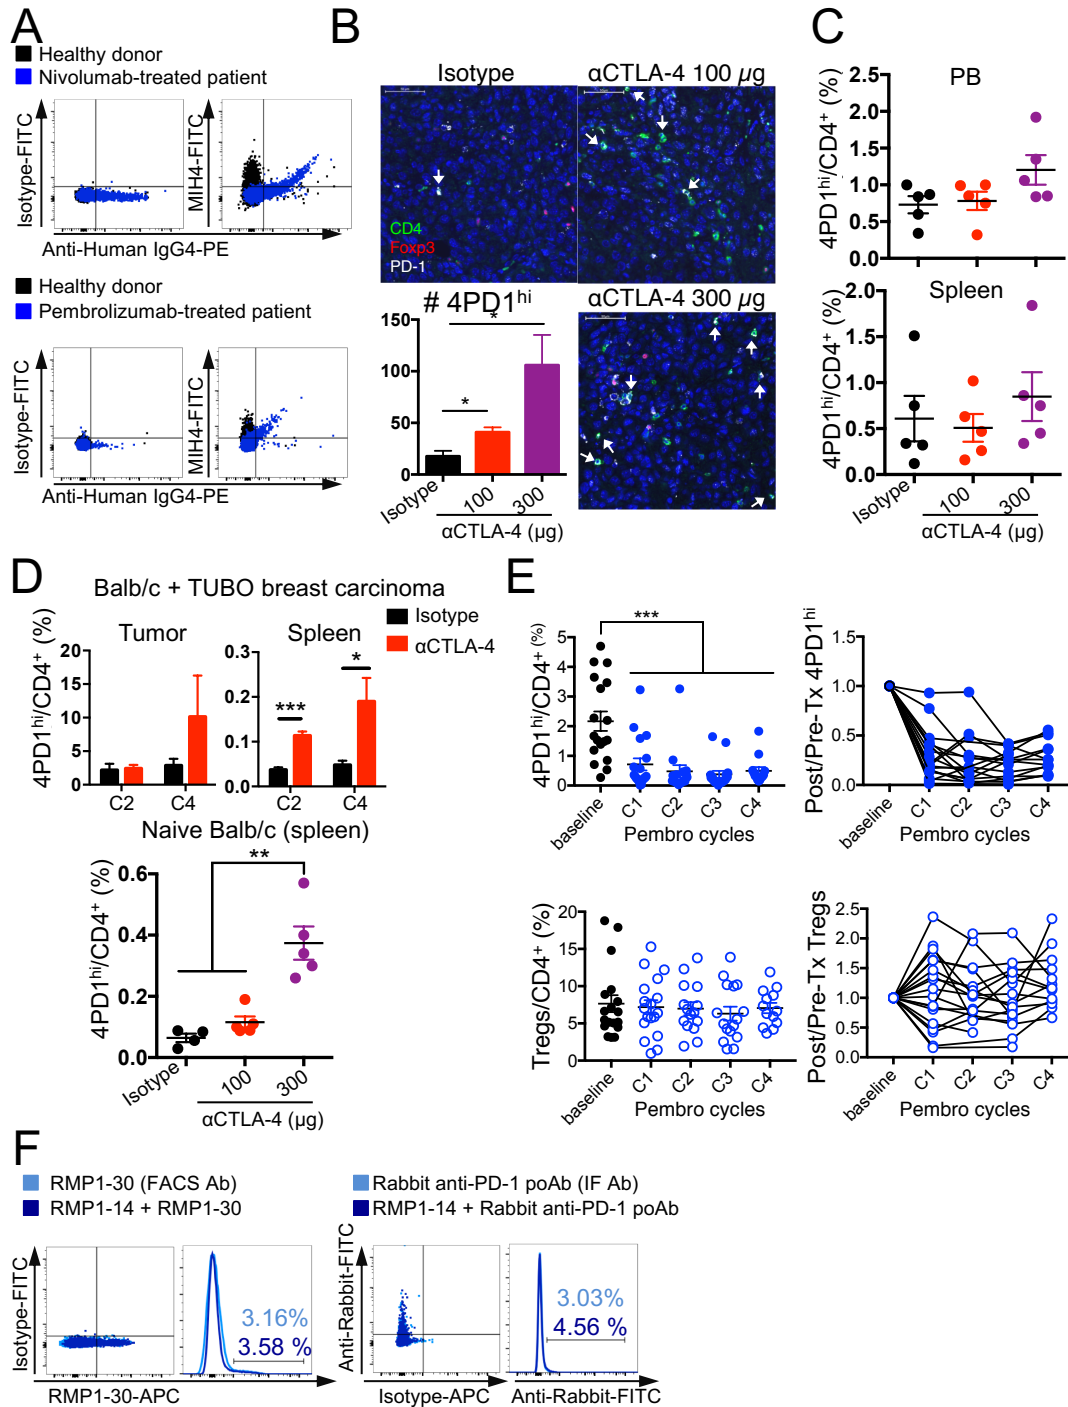

Figure S4. Related to Figure 4. 4PD1<sup>hi</sup> modulation by immune checkpoint blockade. (A) Analysis of cross-reactivity between therapeutic and detection anti-human PD-1 Abs. Peripheral blood mononuclear cells (PBMC) from a healthy donor and a nivolumab- (top) or a pembrolizumab-treated patient (bottom) were co-stained with a PE-labeled anti-human IgG4 (to detect therapeutic anti-PD-1 Abs) and the FITC-labeled anti-human PD-1 used in flow cytometry analyses (MIH4) or the matched isotype IgG. Plots represent the overlay of live single CD4<sup>+</sup> T cells between donor (black) and patients' (blue) samples. (B-D)  $\alpha$ CTLA-4-dose- and tumor-dependent modulation of 4PD1<sup>hi</sup>. (B) B16-melanoma-bearing C57BL/6J mice were treated with  $\alpha$ CTLA-4 monotherapy (100  $\mu$ g or 300  $\mu$ g) or control isotype IgG (300  $\mu$ g) as shown in Figure 4B,

and, one day after treatment completion, tumor biopsies were collected and subjected to immunofluorescent staining of CD4 (AlexaFluor488, green), Foxp3 (AlexaFluor568, red) and PD-1 (AlexaFluor647, white). Representative staining of 4PD1<sup>hi</sup> (indicated by arrows; scale bar, 50 $\mu$ m; 40x original magnification) and quantification of 4PD1<sup>hi</sup> in 3 tumors/group (mean  $\pm$  SEM; unpaired t test). (C) Non-tumor-bearing C57BL/6J mice were treated with 4 courses of  $\alpha$ CTLA-4 (100  $\mu$ g or 300  $\mu$ g) or the matched isotype IgG (300  $\mu$ g), and, one day after treatment completion, 4PD1<sup>hi</sup>/CD4 % was measured in PB and spleen by FACS (mean  $\pm$  SEM; n=5). (D) TUBO-breast-carcinoma-bearing (top) or naive Balb/c (bottom) mice were treated with 4 courses of the standard dose of  $\alpha$ CTLA-4 or the matched isotype IgG (100  $\mu$ g) and 4PD1<sup>hi</sup> were monitored in tumor and spleen after the 2<sup>nd</sup> (C2) and the 4<sup>th</sup> (C4) administration (TUBO-bearing mice; mean  $\pm$  SEM; n=5; unpaired t test) or at the end of treatment (naive mice; mean  $\pm$  SEM; n=4-5; unpaired t test). (E) Changes in circulating 4PD1<sup>hi</sup> in an independent cohort of melanoma patients treated with pembrolizumab (pembro). Circulating 4PD1<sup>hi</sup> and Treg frequencies among CD4<sup>+</sup> T cells and modulation relative to baseline (Post/Pre-Tx) in advanced melanoma patients during pembrolizumab treatment (2mg/kg, q3wks; mean  $\pm$  SEM; n=18; paired t test) (Huang et al., 2017). (F) Analysis of cross-reactivity between therapeutic and detection anti-mouse PD-1 Abs. PD-1 expression in mouse spleen-derived CD4<sup>+</sup> T cells pre-incubated with or without the therapeutic anti-mouse PD-1 Ab used in this study (RMP1-14), as revealed by FACS with the APC-conjugated anti-PD-1 Ab RMP1-30 (left) or with the rabbit anti-PD-1 polyclonal Ab (poAb), used in immunofluorescent stainings (IF), followed by a proper FITC-labeled secondary Ab (right). \* = p<0.05, \*\* = p<0.01, \*\*\* = p<0.001.

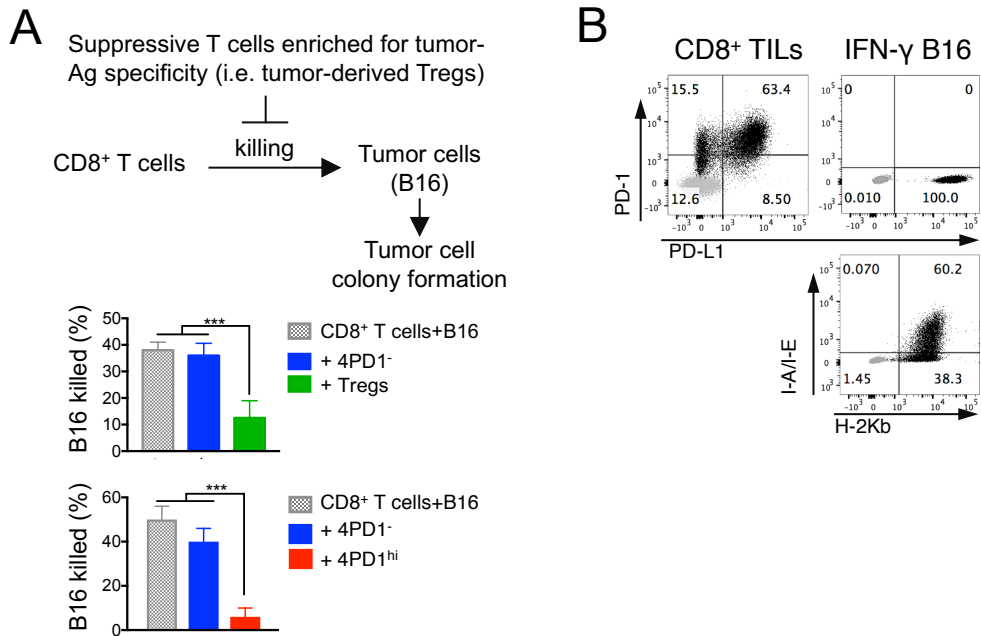

**Figure S5. Related to Figure 5. Effects of Tregs and 4PD1<sup>hi</sup> in 3D killing assay. (A) Inhibition of CD8<sup>+</sup> T-cell-mediated tumor killing by suppressive T cells in a 3D killing assay. In this assay, tumor-antigen specific CD8<sup>+</sup> T cells are co-cultured with tumor cells and suppressive T cells enriched for tumor-antigen specificity (i.e. tumor-derived Tregs) for 48 hr in order to evaluate the inhibition of CD8<sup>+</sup> T-cell-mediated tumor killing. Bar graphs show percent killed B16 cells in co-cultures with tumor-specific CD8<sup>+</sup> T cells (tumor-antigen specific, top; CD8 TILs, bottom) and tumor-derived Tregs (top) or 4PD1<sup>hi</sup> (bottom) in comparison with 4PD1<sup>-</sup> (mean  $\pm$  SD; top, n=3 with CD8<sup>+</sup> T cells alone and 4PD1<sup>-</sup>, n=6 with Tregs; bottom, n=3 with 4PD1<sup>hi</sup>, n=4 with CD8<sup>+</sup> T cells alone, n=5 with 4PD1<sup>-</sup>; unpaired t test: \*\*\* = p<0.001). (B) B16 cells employed in 3D killing assays were pre-treated with IFN- $\gamma$  to up-regulate MHC-I (H-2Kb) and MHC-II (I-A/I-E) and be recognized by both CD8<sup>+</sup> and CD4<sup>+</sup> T cells in culture. Representative FACS plots of the indicated markers in CD8<sup>+</sup> TILs and IFN- $\gamma$ -pre-treated B16 (IFN- $\gamma$ \_B16) used in 3D killing assays. Ag, antigen.**

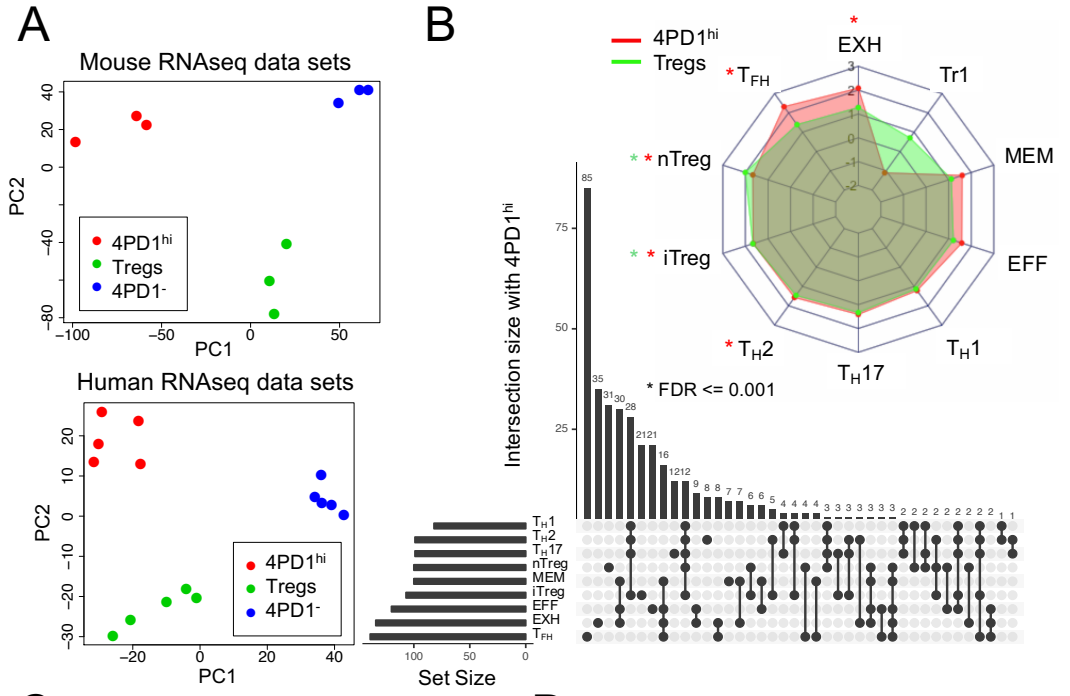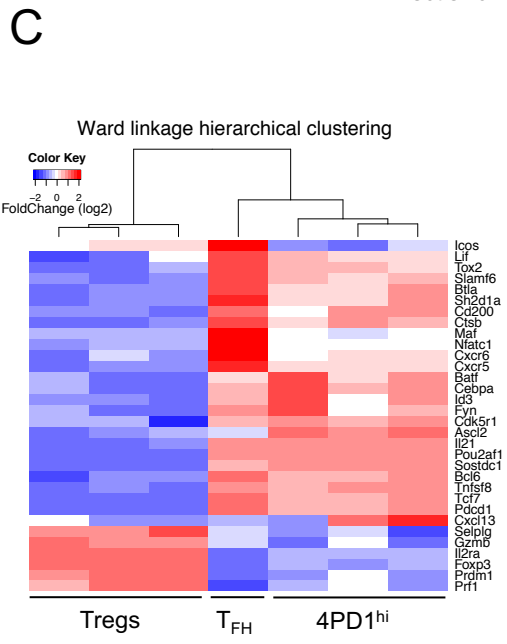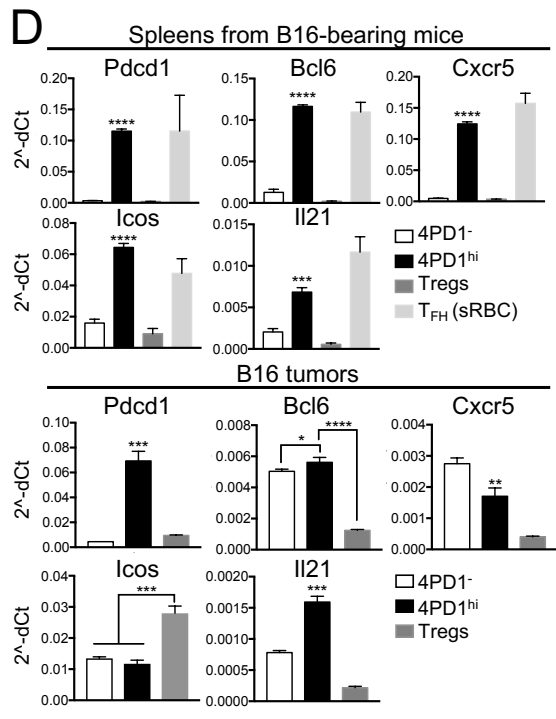



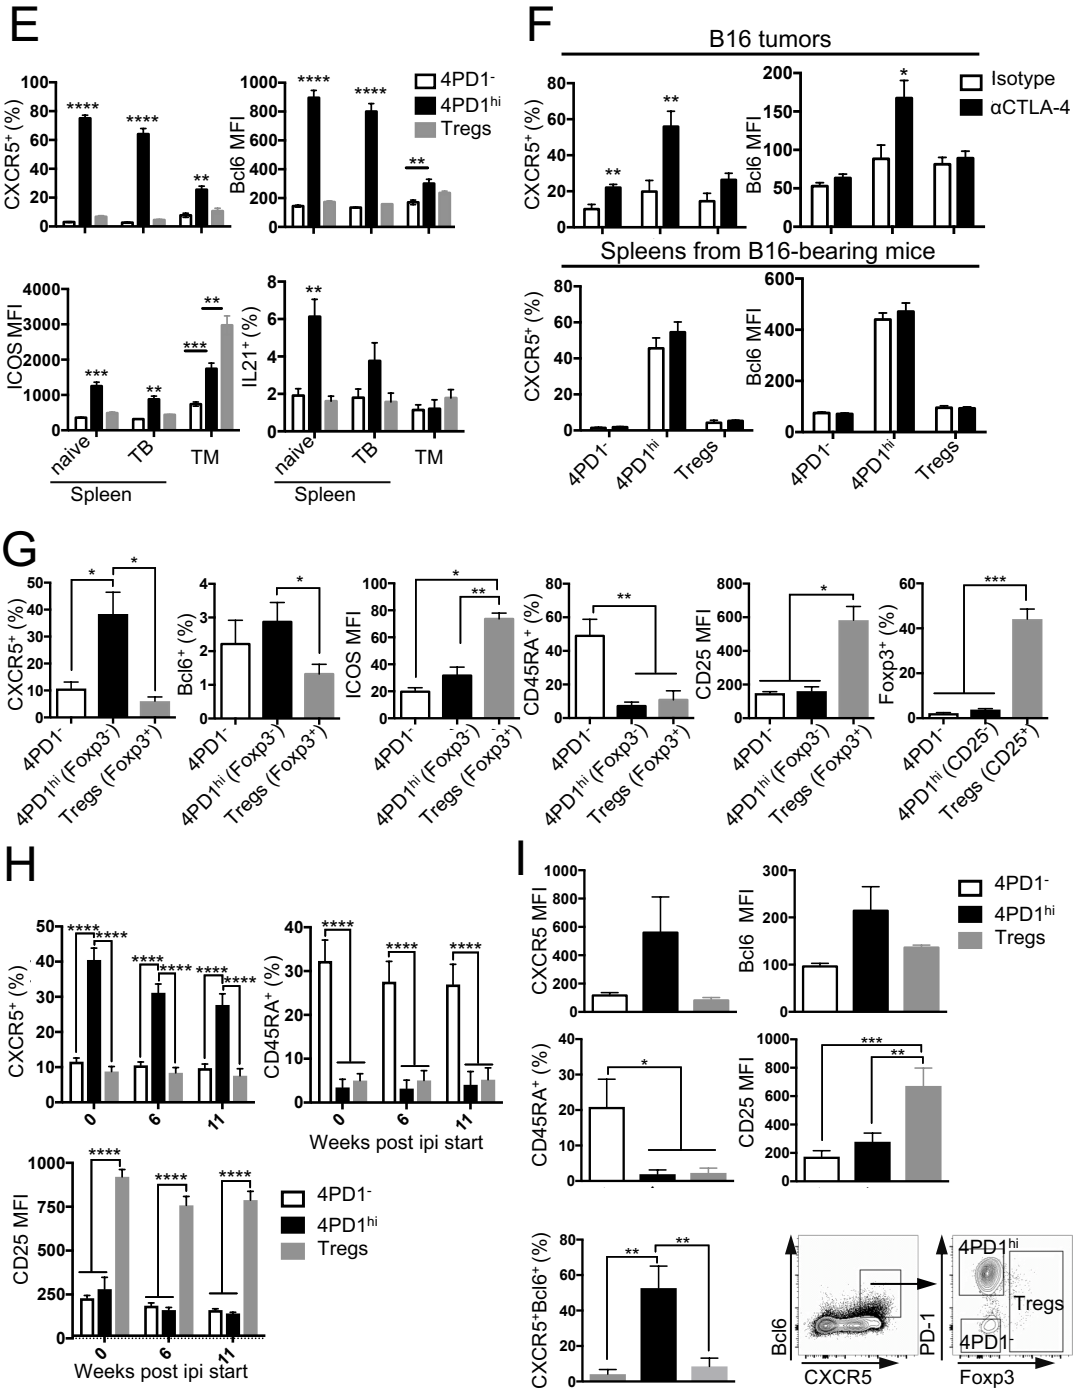

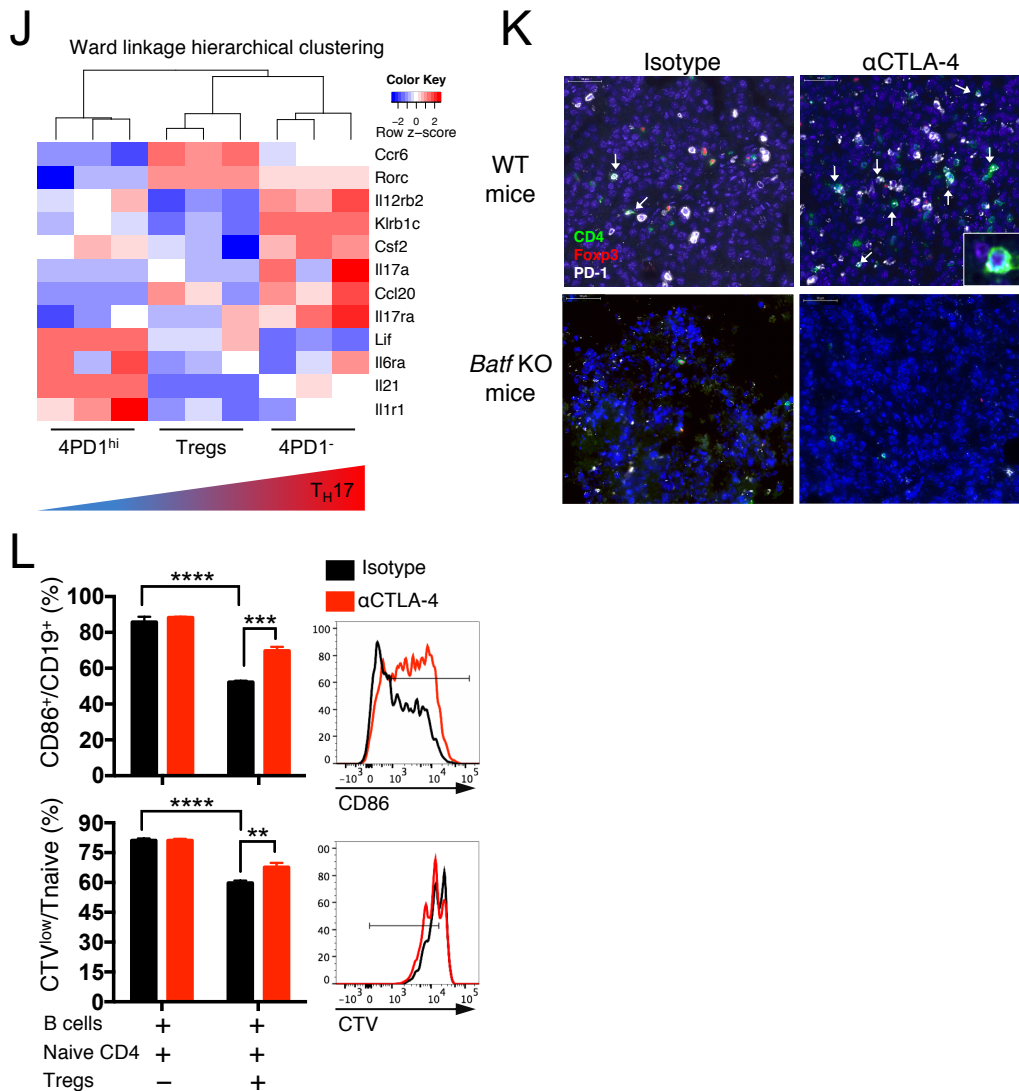

**Figure S6. Related to Figure 6. T<sub>FH</sub>-like phenotype in mouse and human 4PD1<sup>hi</sup>.** (A) Principal component analysis of variably expressed genes (sds>0.04, n=12,083, top) and differentially expressed genes (adjusted p value<0.05, n=2,059, bottom) in mouse splenic (top) and donor-derived (bottom) 4PD1<sup>hi</sup>, 4PD1<sup>-</sup> and Tregs. (B-F) T<sub>FH</sub>-like phenotype expression by 4PD1<sup>hi</sup> from naive and tumor-bearing mice. (B) Gene Set Enrichment Analysis (GSEA) of gene signatures from various CD4<sup>+</sup> T-cell subsets in 4PD1<sup>hi</sup> and Treg gene expression data sets generated in our study. Gene sets for T<sub>H</sub>1, T<sub>H</sub>2, T<sub>H</sub>17, iTREG, and nTREG are from GSE14308, gene sets for EXH, MEM, EFF from GSE30431 and T<sub>FH</sub> from GSE85316, and are all relative to naive T cells. Tr1 gene set is from GSE92940 and relative to Th0 cells. GSEA v2.2.4 was run with the following parameters: 1000 permutations gene set permutation type, using "weighted" enrichment statistic, and Signal2Noise as a metric for ranking genes. The leading-edge genes in each CD4<sup>+</sup> T-cell gene set were compared to identify overlapping and unique genes. A spider plot depicting normalized enrichment scores from the GSEA and a bar plot depicting the overlaps of the various gene sets with 4PD1<sup>hi</sup> data set are shown (B). EXH, exhausted CD4<sup>+</sup> T cells; T<sub>FH</sub>, follicular helper T cells; nTREG, natural regulatory T cells (Tregs); iTREG, inducible Tregs; T<sub>H</sub>1, T helper 1; T<sub>H</sub>2, T helper 2; T<sub>H</sub>17, T helper 17; EFF, effector CD4<sup>+</sup> T cells; MEM, memory CD4<sup>+</sup> T cells; Tr1, type 1 Tregs. (C) Analysis of known T<sub>FH</sub> differentially expressed genes (Choi et al., 2015; Kenefeck et al., 2015; Liu et al., 2012; Miyachi et al., 2016; Table S2) in mouse 4PD1<sup>hi</sup> and Treg data sets (A) in comparison with publicly available "bona fide" mouse T<sub>FH</sub> gene expression

data(Miyauchi et al., 2016). Transcriptomes were normalized relative to the naive T-cell data set in each study to allow for a direct comparison. (D) mRNA expression of the indicated  $T_{FH}$ -associated genes by qPCR in splenic (top) and tumor-derived (bottom)  $4PD1^{hi}$ ,  $4PD1^{-}$  and Tregs isolated from B16-bearing Foxp3-GFP transgenic mice (mean  $\pm$  SD; n=3; unpaired t test,  $4PD1^{hi}$  vs Tregs and  $4PD1^{-}$  unless otherwise specified). Splenic T-cell subsets are compared with  $CXCR5^{+}PD-1^{hi}Foxp3^{-}CD4^{+}T_{FH}$  FACS-sorted from the spleen of Foxp3-GFP transgenic mice immunized with sRBC (mean  $\pm$  SD, n=3). (E) Expression analyses by FACS of the indicated  $T_{FH}$ -associated markers in  $4PD1^{hi}$ ,  $4PD1^{-}$  and Tregs from tumors (TM) and spleens of naive or B16 tumor-bearing (TB) mice (mean  $\pm$  SEM; n=5; unpaired t test,  $4PD1^{hi}$  vs Tregs and  $4PD1^{-}$ ). (F) CXCR5 and Bcl6 expression by FACS in tumor-derived (top) and splenic (bottom)  $4PD1^{hi}$ ,  $4PD1^{-}$  and Tregs from B16-bearing mice treated with  $\alpha$ CTLA-4 or control isotype IgG (100  $\mu$ g) (mean  $\pm$  SEM; n=5; unpaired t test, IgG vs  $\alpha$ CTLA-4). (G-I)  $T_{FH}$ -like phenotype expression by donor- and patient-derived  $4PD1^{hi}$ . (G) Expression analyses by FACS of the indicated  $T_{FH}$ , memory and Treg markers in donor-derived circulating  $4PD1^{hi}$ ,  $4PD1^{-}$  and Tregs (mean  $\pm$  SEM; n=3-6 depending on the marker; paired t test). Tregs and  $4PD1^{hi}$  were gated as live single  $CD45^{+}CD4^{+}Foxp3^{+}$  (Tregs) and  $CD45^{+}CD4^{+}Foxp3^{-}PD-1^{hi}$  ( $4PD1^{hi}$ ), or live single  $CD45^{+}CD4^{+}CD25^{+}$  (Tregs) and  $CD45^{+}CD4^{+}CD25^{-}PD-1^{hi}$  ( $4PD1^{hi}$ ) to measure CD25 and Foxp3 expression respectively. (H) Frequency of  $CXCR5^{+}$  and  $CD45RA^{+}$  cells, and CD25 MFI in circulating  $4PD1^{hi}$ ,  $4PD1^{-}$  and Tregs from advanced melanoma patients before and during ipilimumab treatment (3mg/kg, q3wks; mean  $\pm$  SEM; n=15-20 depending on the time point; paired t test). (I) CXCR5, Bcl6 and CD25 MFI and  $CD45RA^{+}$  % in the indicated subsets gated on live single  $CD4^{+}CD45^{+}$  cells from immunotherapy-naive human melanoma lesions (top). Frequency of  $4PD1^{hi}$ ,  $4PD1^{-}$  and Tregs within the  $CD4^{+}CXCR5^{+}Bcl6^{+}T_{FH}$  gate in the same samples and FACS plots depicting the gating strategy for this analysis (bottom) (mean  $\pm$  SEM; n=10; paired t test). (J-L)  $\alpha$ CTLA-4 increases  $T_{FH}$ -like  $4PD1^{hi}$  and B-cell dependent T-cell priming. (J) Unsupervised hierarchical clustering with the related heatmap of  $T_{H17}$ -associated genes(Kenefeck et al., 2015) in gene expression data sets from functionally validated mouse splenic  $4PD1^{hi}$ ,  $4PD1^{-}$  and Tregs (A, top). (K) Representative immunofluorescent stainings of CD4 (AlexaFluor488, green), Foxp3 (AlexaFluor568, red) and PD-1 (AlexaFluor647, white) in tumor tissue sections from B16-bearing WT and *Batf* knockout (KO) mice treated with  $\alpha$ CTLA-4 (100  $\mu$ g) or control isotype IgG (scale bar, 50 $\mu$ m; 40x original magnification; inset, 60x original magnification) as quantified in Figure 6C. Arrows indicate  $4PD1^{hi}$  in tumors from WT mice. (L) CD86 expression in  $CD45.1^{+}CD19^{+}$  B cells (top) and proliferation (CTV<sup>low</sup>) of target naive  $CD4^{+}$  T cells (bottom) co-cultured with or without Tregs in the presence of  $\alpha$ CTLA-4 or control isotype IgG for 48 hr (mean  $\pm$  SD; n=3; unpaired t test). Representative plots from B cells+Tregs+CD4 co-cultures treated with  $\alpha$ CTLA-4 or control isotype IgG are shown. \* = p<0.05, \*\* = p<0.01, \*\*\* = p<0.001, \*\*\*\* = p<0.0001.

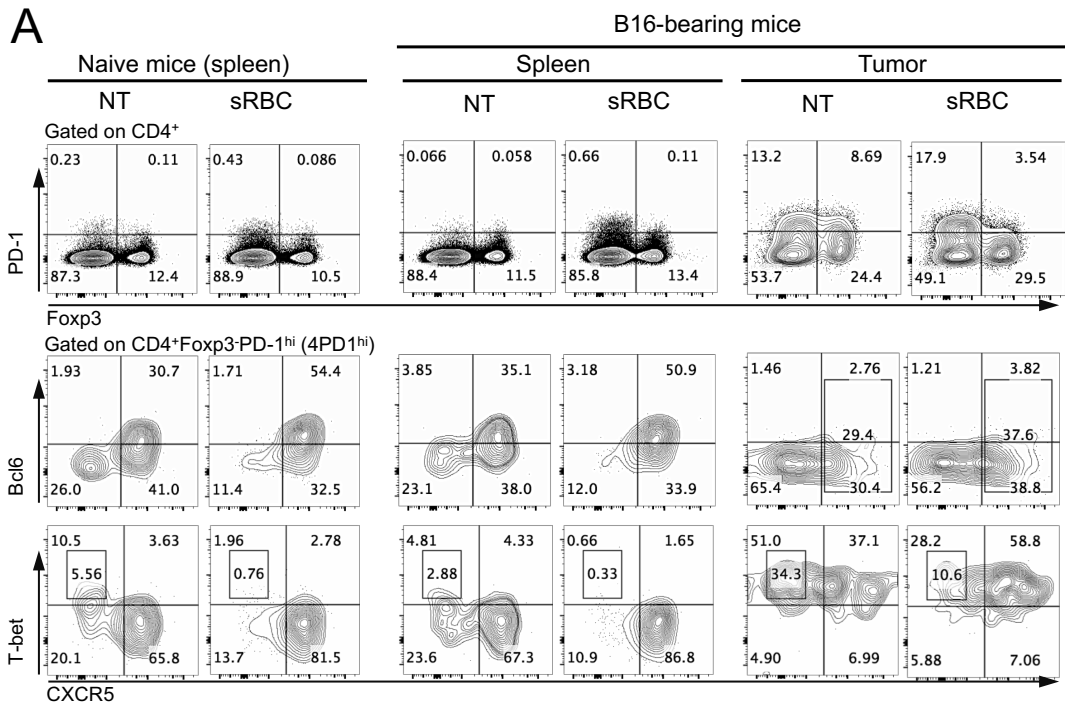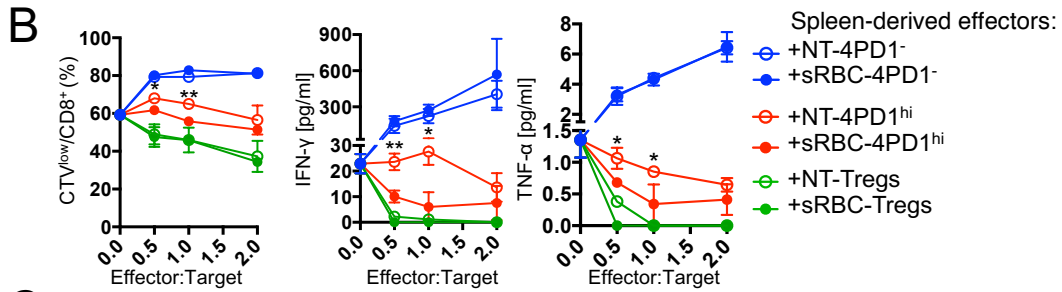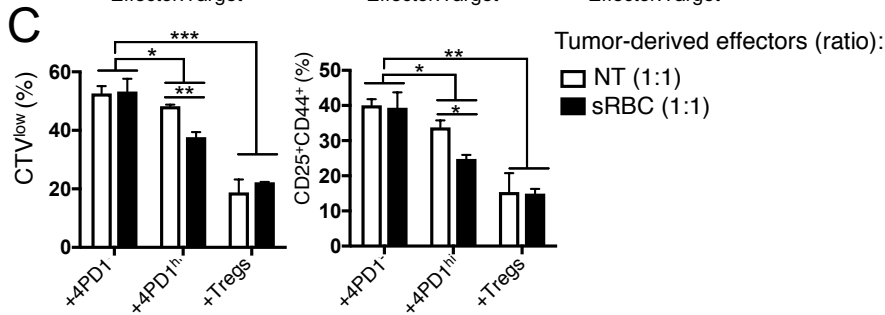

**D**

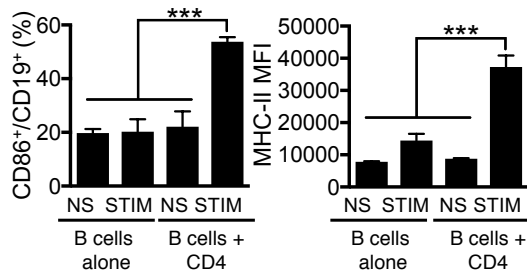

**E**

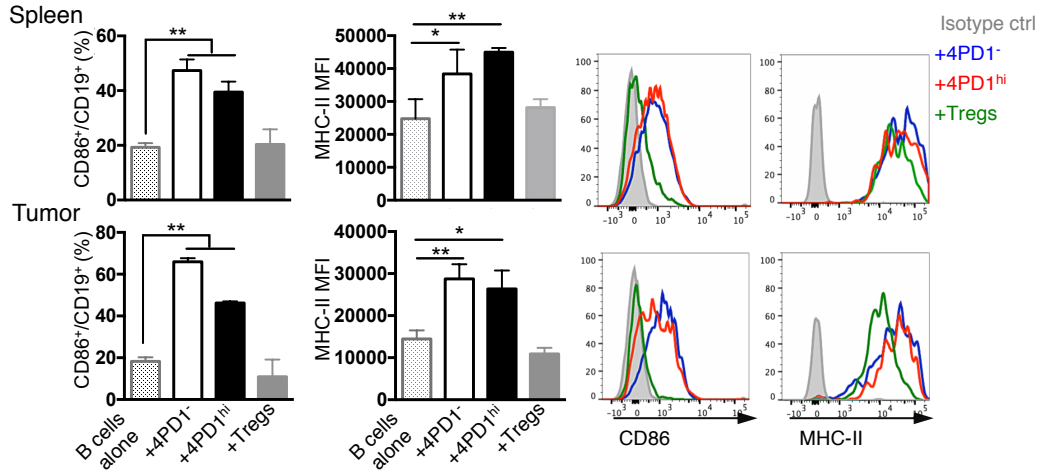

**F**

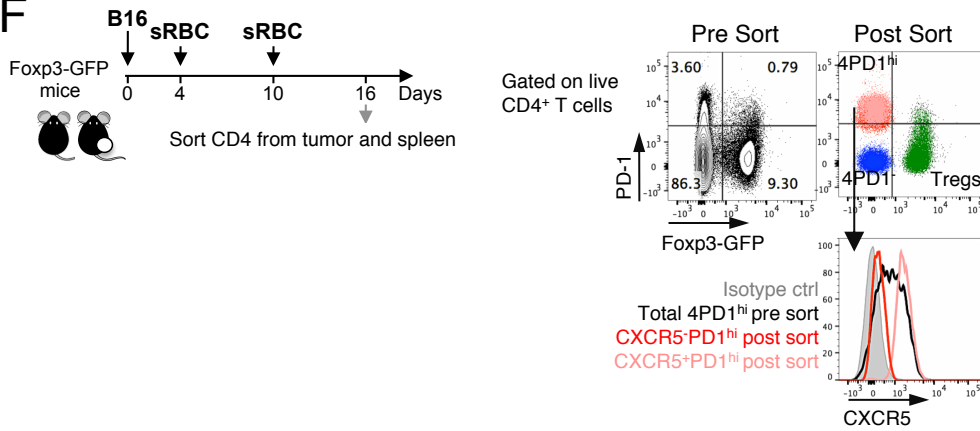

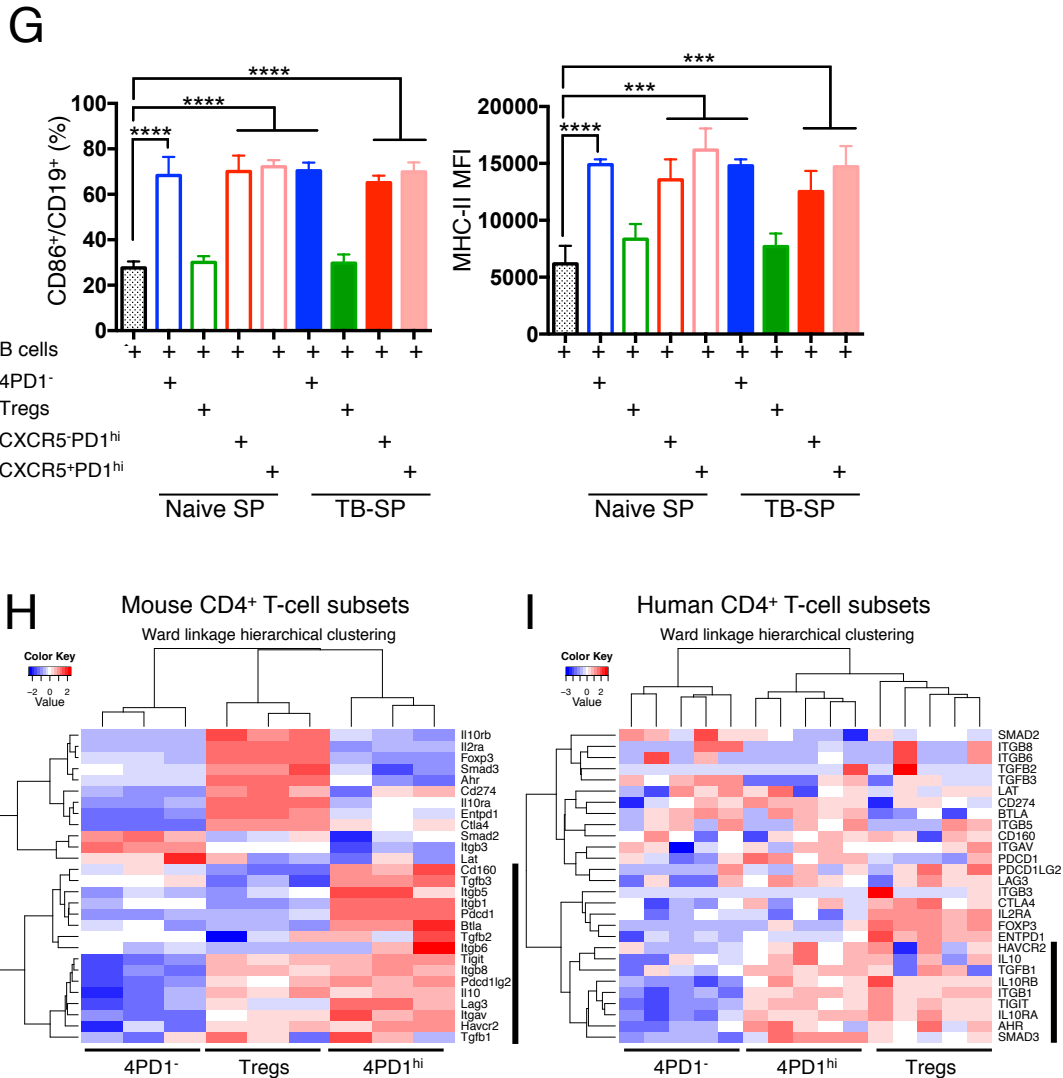

**Figure S7. Related to Figure 7. Functional activity of T<sub>FH</sub>-like 4PD1<sup>hi</sup>.** (A-C) 4PD1<sup>hi</sup> phenotypic and functional modulation by sRBC immunization. (A) Representative FACS plots showing modulation of 4PD1<sup>hi</sup> % and CXCR5, Bcl6, and T-bet expression in 4PD1<sup>hi</sup> from naive and B16-bearing mice one week after immunization with sRBC in comparison with untreated mice (NT). Increased Bcl6 and/or CXCR5 expression and reduced Bcl6<sup>-</sup>CXCR5<sup>-</sup> and Tbet<sup>+</sup>CXCR5<sup>-</sup> cell proportion within 4PD1<sup>hi</sup> from both spleens and tumors in naive and B16-bearing mice immunized with sRBC indicate T<sub>FH</sub> differentiation. (B,C) 4PD1<sup>hi</sup>, 4PD1<sup>-</sup> and Tregs were FACS-sorted from spleens (B) or tumors (C) of non-treated (NT) or sRBC-immunized B16-bearing Foxp3-GFP transgenic mice as shown in Figure 7A and tested in suppression assays at the indicated effector:target ratios. Proliferation of CD45.1<sup>+</sup>CD8<sup>+</sup> target T cells (CTV<sup>low</sup>) cultured with the indicated spleen-derived CD4<sup>+</sup> T-cell subsets and quantification by Luminex-based bead immunoassay of IFN- $\gamma$  and TNF- $\alpha$  in culture supernatants after 48-hr incubation (mean  $\pm$  SD; n=3; unpaired t test, NT-4PD1<sup>hi</sup> vs sRBC-4PD1<sup>hi</sup>) (B). (C) Proliferation (CTV<sup>low</sup>) and activation (CD25<sup>+</sup>CD44<sup>+</sup>) of CD45.1<sup>+</sup>CD4<sup>+</sup> target T cells co-cultured at 1:1 ratio with the indicated tumor-derived CD4<sup>+</sup> T-cell subsets for 48 hr (mean  $\pm$  SD; n=2-3; unpaired t test). (D-G) Effects of 4PD1<sup>hi</sup> in T-cell dependent B-cell activation assay. (D) Culture stimulation conditions used in B-cell activation assays for the detection of T-cell-mediated effects on B cell activation. CD19<sup>+</sup>CD4<sup>+</sup>CD45.1<sup>+</sup> B cells were cultured alone (B cells alone) or with CD45.1<sup>+</sup>CD4<sup>+</sup> T cells (B cells + CD4) at 2:1 ratio and stimulated (STIM) or not (NS) with PHA+IL-

2. After 48-hr incubation, percent of CD86<sup>+</sup> and MHC-II MFI in total B cells were quantified by FACS (mean  $\pm$  SD; n=3; unpaired t test). In these conditions, activation of B cells is observed only when they are stimulated in the presence of T cells (T-cell dependent B-cell activation). (E) B-cell activation assays with 4PD1<sup>hi</sup>, 4PD1<sup>-</sup> and total Tregs FACS-sorted from spleens (top) or tumors (bottom) of untreated B16-bearing Foxp3-GFP mice. Representative FACS plots and quantification of percent CD86<sup>+</sup> (average  $\pm$  SEM; n=2 independent experiments with tumor-derived T cells, n=3 independent experiments with spleen-derived T cells; unpaired t test) and MHC-II MFI (average  $\pm$  SD; n=3-5 replicates from one representative experiment; unpaired t test) within CD19<sup>+</sup>CD4<sup>-</sup>CD45.1<sup>+</sup> target B cells stimulated alone or with the indicated CD4<sup>+</sup> T-cell subsets for 48 hr. (F,G) Naive and B16-bearing mice were immunized with sRBC and CXCR5<sup>+</sup> and CXCR5<sup>-</sup> 4PD1<sup>hi</sup> were sorted from spleens and tumors along with 4PD1<sup>-</sup> and total Tregs (F) and tested in B-cell activation assays (G). (G) CD86<sup>+</sup> cell % and MHC-II MFI in target CD45.1<sup>+</sup>CD4<sup>-</sup>CD19<sup>+</sup> B cells stimulated in culture with the indicated CD4<sup>+</sup> T-cell subsets for 48 hr (mean  $\pm$  SD; n=4-6; unpaired t test). (H,I) Unsupervised hierarchical clustering with the related heatmaps of immune inhibitory genes (Table S2) in RNAseq data sets from mouse splenic (H) and donor-derived (I) 4PD1<sup>hi</sup>, 4PD1<sup>-</sup> and Tregs (Figure S6A). Genes overexpressed in 4PD1<sup>hi</sup> are highlighted with a black line. \* = p<0.05, \*\* = p<0.01, \*\*\* = p<0.001, \*\*\*\* = p<0.0001.

## Supplemental Tables

Table S1

| Family           | Sequence 5'-3'               |    | Estimated Product Size |
|------------------|------------------------------|----|------------------------|
| MuBV1            | CTGAATGCCAGACAGCTCCAAGC      | 1  | 170                    |
| MuBV2            | TCACTGATACGGAGCTGAGGC        | 2  | 161                    |
| MuBV3.1          | CCTTGCAGCCTAGAAATTCAGT       | 3  | 150                    |
| MuBV4            | GCCTCAAGTCGTTCCAACCTC        | 4  | 189                    |
| MuBV5.1          | CATTATGATAAAATGGAGAGAGAT     | 5  | 222                    |
| MuBV5.2          | AAGGTGGAGAGAGACAAAGGATC      | 6  | 213                    |
| MuBV5.3          | AGAAAGGAAACCTGCCTGGTT        | 7  | 200                    |
| MuBV6            | CTCTCACTGTGACATCTGCC         | 8  | 143                    |
| MuBV7            | TACAGGGTCTCACGGAAGAAGC       | 9  | 177                    |
| MuBV8.1          | CATTACTCATATGTGCTGAC         | 10 | 228                    |
| MuBV8.2          | CATTATTCATATGGTGCTGGC        | 11 | 228                    |
| MuBV8.3          | TGCTGGCAACCTTCGAATAGGA       | 12 | 214                    |
| MuBV9            | TCTCTCTACATTGGCTCTGCAGGC     | 13 | 144                    |
| MuBV10           | ATCAAGTCTGTAGAGCCGGAGGA      | 14 | 135                    |
| MuBV11           | GCACTCAACTCTGAAGATCCAGAGC    | 15 | 151                    |
| MuBV12           | GATGGTGGGGCTTTCAAGGATC       | 16 | 204                    |
| MuBV13           | AGGCCTAAAGGAACTAACTCCAC      | 17 | 165                    |
| MuBV14           | ACGACCAATTCATCCTAAGCAC       | 18 | 155                    |
| MuBV15           | CCCATCAGTCATCCCAACTTATCC     | 19 | 174                    |
| MuBV16           | CACTCTGAAAATCCAACCCAC        | 20 | 145                    |
| MuBV17           | AGTGTTCTCGAACTCACAG          | 21 | 167                    |
| MuBV18           | CAGCCGGCCAAACCTAACATTCTC     | 22 | 169                    |
| MuBV19           | CTGCTAAGAAACCATGTACCA        | 23 | 161                    |
| MuBV20           | TCTGCAGCCTGGGAATCAGAA        | 24 | 149                    |
| Constant Primers |                              |    |                        |
| MuTCB3C          | GCCAGAAGGTAGCAGAGACCC        |    |                        |
| MuTCB1up         | GAGAAATGTGACTCCACCCAA        |    |                        |
| MuTCB1-FAM       | FAM-(C)TTGGGTGGAGTCACATTTCTC |    |                        |
| MuTCB1-HEX       | HEX-(C)TTGGGTGGAGTCACATTTCTC |    |                        |

Table S1. Related to Figure S1E and the STAR Methods section. Primers used for spectratyping analyses.



**Table S2**

| <b>T<sub>FH</sub> differentially expressed gene names</b> | <b>Immunosuppressive gene names</b> |
|-----------------------------------------------------------|-------------------------------------|
| Ascl2                                                     | BTLA                                |
| Batf                                                      | CD160                               |
| Bcl6                                                      | CTLA4                               |
| Btla                                                      | FOXP3                               |
| Cd200                                                     | HAVCR2                              |
| Cdk5r1                                                    | AHR                                 |
| Cebpa                                                     | IL10                                |
| Ctsb                                                      | IL10RA                              |
| Cxcl13                                                    | IL10RB                              |
| Cxcr5                                                     | LAG3                                |
| Cxcr6                                                     | PDCD1                               |
| Foxp3                                                     | PDCD1LG2                            |
| Fyn                                                       | CD274                               |
| Gzmb                                                      | TGFB1                               |
| Icos                                                      | TGFB2                               |
| Id3                                                       | TGFB3                               |
| Il21                                                      | SMAD2                               |
| Il2ra                                                     | SMAD3                               |
| Lif                                                       | LAT                                 |
| Maf                                                       | ITGAV                               |
| Nfatc1                                                    | ITGB1                               |
| Pdcd1                                                     | ITGB3                               |
| Pou2af1                                                   | ITGB5                               |
| Prdm1                                                     | ITGB6                               |
| Prf1                                                      | ITGB8                               |
| Selplg                                                    | ENTPD1                              |
| Sh2d1a                                                    | TIGIT                               |
| Slamf6                                                    | IL2RA                               |
| Sostdc1                                                   |                                     |
| Tcf7                                                      |                                     |
| Tnfsf8                                                    |                                     |
| Tox2                                                      |                                     |

Table S2. Related to Figure S6C and S7H,I and the STAR Methods section. T<sub>FH</sub> differentially expressed genes tested in mouse 4PD1<sup>hi</sup>, Tregs and conventional T<sub>FH</sub> RNAseq data sets and immunosuppressive genes analyzed in RNAseq data sets from mouse and human CD4<sup>+</sup> T-cell subsets.
